# Supplementary material for: Effects of Phytase and Microalgae Supplementation on the Utilization of Aquafeeds for European Seabass (Dicentrarchus labrax) Formulated with a High Inclusion Level of Plant Protein
Source: Hindawi journal article supplement (doi:10.1155/2024/4775004), 2024-01-01
Supplement: f1 [file 4775004.f1.pdf]

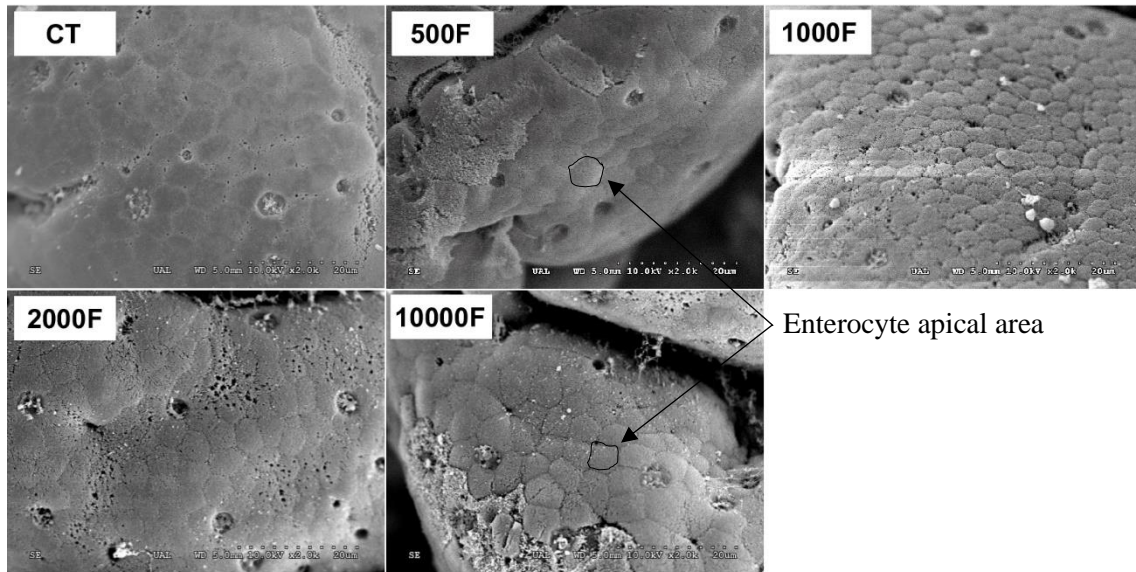

**Figure Supplementary 1.** Detail of the apical side of the enterocytes of the intestinal epithelium in juvenile seabass fed with the experimental diets. Scanning Electron Microscopy (SEM) images (SEM scale: 20µm). Dietary codes: CT: control diet without phytase and microalgae; 500F: diet containing 500 FTU; 1000F: diet containing 1000 FTU; 2000F: diet containing 2000 FTU; 10000F: diet containing 10000 FTU.
