# Supplementary material for: Effects of Phytase and Microalgae Supplementation on the Utilization of Aquafeeds for European Seabass (Dicentrarchus labrax) Formulated with a High Inclusion Level of Plant Protein
Source: Hindawi journal article supplement (doi:10.1155/2024/4775004), 2024-01-01
Supplement: f2 [file 4775004.f2.pdf]

**Table Supplementary 1.** Morphometric analysis performed on SEM images from the intestinal mucosa of seabass specimens at the end of the feeding trial.

| <b>Enterocyte apical area (<math>\mu\text{m}^2</math>)</b> |                    |
|------------------------------------------------------------|--------------------|
| <b>CT</b>                                                  | 21.83 $\pm$ 2.52 b |
| <b>500F</b>                                                | 20.44 $\pm$ 3.18 b |
| <b>1000F</b>                                               | 17.64 $\pm$ 2.06 a |
| <b>2000F</b>                                               | 20.70 $\pm$ 2.82 b |
| <b>10000F</b>                                              | 20.83 $\pm$ 2.45 b |
| <i>p</i>                                                   | <0.0001            |

Values are expressed as mean  $\pm$  SD (n=6). Dietary codes: CT: control diet without phytase and microalgae; 500F: diet containing 500 FTU; 1000F: diet containing 1000 FTU; 2000F: diet containing 2000 FTU; 10000F: diet containing 10000 FTU.
