# Supplementary material for: Effects of Phytase and Microalgae Supplementation on the Utilization of Aquafeeds for European Seabass (Dicentrarchus labrax) Formulated with a High Inclusion Level of Plant Protein
Source: Hindawi journal article supplement (doi:10.1155/2024/4775004), 2024-01-01
Supplement: f4 [file 4775004.f4.pdf]

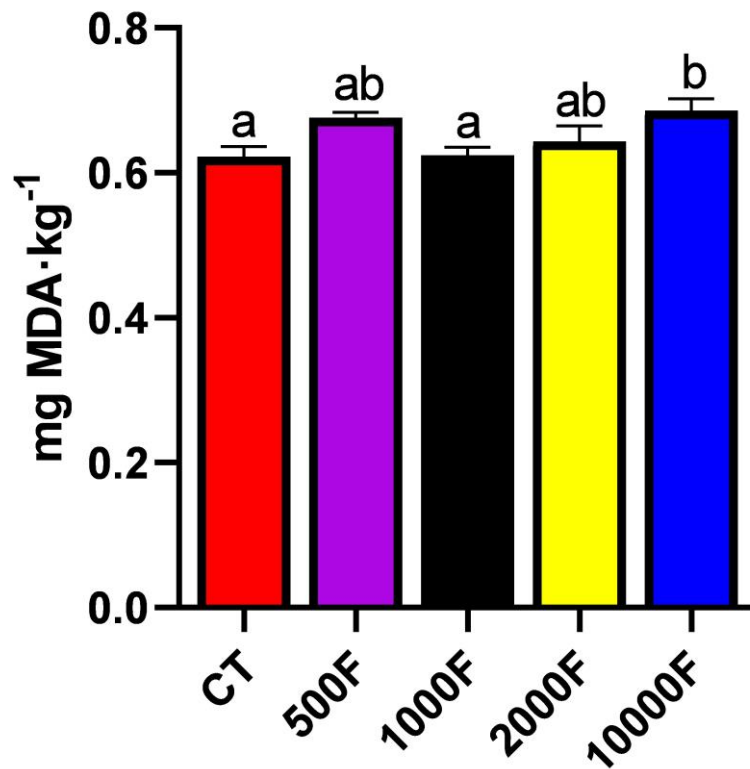

**Figure Supplementary 3.** Effects of the different experimental diets on the thiobarbituric Acid Reactive Substances (TBARS, mg MDA/kg) ( $p = 0.007$ ) content in seabass muscle at the end of the feeding trial (mean  $\pm$  SD,  $n=12$ ). Different letters indicate statistically significant differences among dietary treatments ( $p < 0.05$ ). Dietary codes: CT: control diet without phytase and microalgae; 500F: diet containing 500 FTU; 1000F: diet containing 1000 FTU; 2000F: diet containing 2000 FTU; 10000F: diet containing 10000 FTU.
